1 **Opsin gene evolution in amphibious and terrestrial combtooth blennies (Blenniidae)**

2 Running title: Vision from water to land in blennies

3

4 Fabio Cortesi<sup>1</sup>, Karen L. Cheney<sup>1,2</sup>, Georgina M. Cooke<sup>3</sup>, Terry J. Ord<sup>3</sup>

5

6 <sup>1</sup>Queensland Brain Institute and <sup>2</sup>School of Biological Sciences, The University of  
7 Queensland, Brisbane, QLD 4072, Australia

8 <sup>3</sup>School of Biological, Earth and Environmental Sciences, University of New South Wales,  
9 Sydney 2052, Australia

10 Correspondence: F Cortesi, Fax: +61 (0)7 33654522, E-mail: [fabio.cortesi@uqconnect.edu.au](mailto:fabio.cortesi@uqconnect.edu.au)

11

12 **Abstract**

13 Evolutionary adaptations to life on land include changes to the physiology, morphology and  
14 behaviour of an animal in response to physical differences between water and air. The visual  
15 systems of amphibious species show pronounced morphological adaptations; yet, whether  
16 molecular changes also occur remains largely unknown. Here, we investigated the molecular  
17 evolution of visual pigment genes (opsins) in amphibious and terrestrial fishes belonging to  
18 the Salaria division of blennies (Blenniidae). We hypothesized that when conquering land,  
19 blenny opsins adapt – in terms of sequence variation and/or gene expression – to match both  
20 higher light intensities as well as the broader light spectrum. Using retinal transcriptomes in  
21 six species ranging from fully aquatic to fully terrestrial, we found very little variation in  
22 opsin gene sequences or gene expression between species. All blennies expressed a single rod  
23 opsin gene as well as two cone opsin genes sensitive to longer-wavelengths of light: *RH2A-1*  
24 (green-sensitive) and *LWS* (red-sensitive). They also expressed one or two short-wavelength-  
25 sensitive cone opsin genes (*SWS2A $\alpha$* , *SWS2A $\beta$* ; blue-sensitive) in a phylogenetically inert  
26 manner. However, based on amino acid predictions, both SWS2A proteins confer similar  
27 peak spectral sensitivities and differential expression is therefore unlikely to be ecologically  
28 significant. Red-sensitivity is likely beneficial for feeding on algae and detritus, the main  
29 food source of Salaria blennies, and could be co-adapted to perceive visual displays in  
30 terrestrial species, which often use red dorsal fins to signal during aggressive disputes and  
31 courtship. Our data suggests that on the molecular level, the visual systems that evolved in  
32 aquatic blennies have been retained in species that have transitioned onto land.

33

34 **Keywords** fish, vision, transcriptomics, gene duplication, visual pigment

## 35 **Introduction**

36 The evolution of tetrapods provides a textbook example for the transition from water-to-land  
37 and occurred in the Devonian around 380 million years ago (MacIver et al. 2017).  
38 Interestingly, terrestrial or semi-terrestrial (amphibious) lifestyles, have evolved  
39 independently in at least thirty-three osteichthyan families (Ord and Cooke 2016, Wright and  
40 Turko 2016). Selective forces that drive fishes to leave the water may include access to food,  
41 new or better resources for reproduction (Shimizu et al. 2006), an escape from aquatic  
42 predation (Ord et al. 2017) or reduced competition (reviewed in Sayer 2005, Wright and  
43 Turko 2016). However, plastic and/or evolutionary adaptations are often needed in response  
44 to the extreme environmental changes between water and air. Such adaptations to life on land  
45 include: aerial respiration (Mandic et al. 2009, Regan et al. 2011), mucus secretion to prevent  
46 dehydration (Smith 1930, Sturla et al. 2002), and shifts in ammonia household to avoid NH<sub>3</sub>  
47 intoxication (Davenport and Sayer 1986, Chew and Ip 2014). Skeletal modifications are also  
48 common and may be triggered due to changes in locomotion (Kawano and Blob 2013, Brunt  
49 et al. 2016), an increase in body weight due to increase in apparent gravity (Turko et al.  
50 2017), and by elevated oxygen content (Rossi et al. 2018). Moreover, behavioural  
51 modifications may occur, such as shade seeking to avoid desiccation during low tide  
52 (Colombini et al. 1995, Ord and Tonia Hsieh 2011).

53 The sensory systems of animals may also change as they move on to land. Since most  
54 fishes lack eyelids or similar structures, many amphibious fish species have modifications  
55 such as pigmented corneas and lenses, horizontal pupils and retractable eyes, to cope with  
56 increased light intensity on land (Sayer 2005). The refractive index of air versus water is also  
57 drastically different requiring modifications of the cornea, the lens or even the retina itself to  
58 maintain acuity when switching between environments (Sayer 2005). An extreme example of  
59 this can be found in the four-eyed fish, *Anableps anableps*, which has horizontally divided  
60 eyes: the top half has a flatter cornea compared to the bottom half to allow simultaneous  
61 vision above and below water, respectively (Swamynathan et al. 2003). However, while  
62 morphological adaptations have been studied in some detail, very little is known about  
63 possible molecular changes to the visual systems of amphibious and terrestrial fishes.

64 At the core of animal vision lie the opsin proteins that, together with a vitamin A-  
65 derived chromophore, form a light-sensitive photopigment located in the photoreceptors of  
66 the retina (Wald 1968, Hunt et al. 2014). Ancestral opsin gene duplications and subsequent  
67 changes to their amino acid compositions have led to five classes of vertebrate visual opsins  
68 that can be defined by their photoreceptor specificities and the different wavelengths of light

69 they are maximally sensitive to ( $\lambda_{\max}$ ) (Hunt et al. 2014). RH1, the rod opsin is expressed in  
70 rod cells and used for dim-light vision, while the four other opsin classes are expressed in  
71 cone photoreceptors and used for daylight colour vision. These are: two short-wavelength,  
72 ultraviolet (UV) and blue-sensitive opsins (SWS1 and SWS2); one medium-wavelength-  
73 sensitive green opsin (RH2); and a long-wavelength-sensitive red opsin (LWS) (Yokoyama  
74 2002). In teleost fishes and amphibians with different cone morphologies, SWS opsins are  
75 further expressed in single cones, while RH2 and LWS opsins are found in double cones (two  
76 single cones that are fused together) (Hunt et al. 2014).

77 The evolution of visual opsins in teleost fishes is especially dynamic involving  
78 additional gene duplications, deletions, pseudogenizations and gene conversions, which has  
79 led to fishes having between one and 40 opsin genes in their genomes (Cortesi et al. 2015,  
80 Lin et al. 2017, Musilova et al. 2018 preprint). This diversity is primarily thought to be due to  
81 the different light environments fishes inhabit. For example, light at either end of the visible  
82 spectrum gets absorbed with increasing depth and consequently deeper living species  
83 gradually lose their *SWS1* and *LWS* genes (Musilova et al. 2018 preprint). Species living in  
84 murky red-light dominated habitats, on the other hand, often have red-shifted visual systems  
85 (e.g., Hofmann et al. 2009, Escobar-Camacho et al. 2016); however, this could also be due to  
86 sexual selection (see Sandkam et al. 2018 for a recent review on guppy *LWS* evolution).  
87 Mutations in the coding sequence, differential expression of opsin genes and switches  
88 between A<sub>1</sub>-based and A<sub>2</sub>-based chromophores also enable adaptations to more subtle  
89 differences in photic environments, such as between seasons (Shimmura et al., 2017),  
90 microhabitats (Fuller et al. 2010, Luehrmann et al. in review), feeding habits (Stieb et al.  
91 2017), predation pressure (Sandkam et al., 2018), or in response to sexual selection  
92 (Seehausen et al. 2008).

93 In this study, we focused on the evolution of opsin genes in amphibious and terrestrial  
94 combtooth blennies (Blenniidae). Combtooth blennies are small (< 10 cm) scaleless fish that  
95 are commonly found in many shallow tropical and warm water marine habitats, including  
96 coral reefs, estuaries, mangroves, tide pools, and sometimes on land (Hundt et al. 2014a,  
97 Hundt and Simons 2018). They comprise one of the most diverse percomorph families  
98 consisting of 400 described species (58 genera; fishbase.org) that fall into 13 phylogenetic  
99 clades (Hundt et al. 2014a, Hundt and Simons 2018). Within the Salariini division of  
100 blennies, amphibious behaviour is common, and more than twenty species in at least three  
101 genera exhibit a highly terrestrial lifestyle (Ord and Cooke 2016). In these species, post-  
102 settlement larvae (~30 days from hatching; Platt and Ord 2015) are believed to transition to a

103 terrestrial lifestyle within the supralittoral splash zone and do not voluntarily return to the  
104 aquatic environment (Ord et al. 2017). Terrestrial blennies move freely about the rocks using  
105 a tail-twisting behaviour that allows them to efficiently shuffle along the rocks and jump  
106 distances of several body lengths (Hsieh 2010). Like most intertidal blennies, amphibious and  
107 terrestrial species feed primarily on detritus and algae (Hundt et al. 2014a, Hundt et al.  
108 2014b, Hundt and Simons 2018) and possess a cryptic body colouration and patterning that  
109 reduces predation (Morgans and Ord 2013, Ord et al. 2017). However, unlike aquatic and  
110 most amphibious blennies, adults of terrestrial species in both sexes display a brightly  
111 coloured red-orange dorsal fin during aggressive disputes and courtship (Bhikajee and Green  
112 2002, Shimizu et al. 2006, Ord and Tonia Hsieh 2011). These conspicuous fins contrast  
113 against the rocky backgrounds on which the blennies are active (Morgans and Ord 2013,  
114 Morgans et al. 2014), and are further accentuated in courting males by a darkening of the  
115 body to a largely uniform charcoal black (Ord and Tonia Hsieh 2011).

116 Morphological adaptation for aerial vision amongst the Salariini has been reported for  
117 the amphibious (possibly exclusively terrestrial) Kirk's blenny, *Alticus kirkii*, which, by  
118 separating the cornea conjunctiva and cornea propria, has formed an additional eye chamber  
119 that is adjustable to accommodate changes in refracting indices of media (Zander 1974).  
120 Also, the retina of the mildly amphibious rippled rockskipper, *Istiblennius edentulus*, (see  
121 Ord and Cooke 2016) shows prominent swellings and folds, and a central depression into  
122 which the lens can be retracted. This allows light to be focused onto the back of the eye in  
123 both water and air (Zander 1974).

124 In terms of the molecular basis for vision, little is known about the evolution of opsin  
125 genes in Salariini blennies. However, a close relative to the Salariini, the rock-pool blenny,  
126 *Parablennius parvicornis*, was recently found to possess six cone opsins and one rod opsin in  
127 its genome (Musilova et al. 2018 preprint). Also, transcriptome sequencing in another aquatic  
128 blenny, the bluestriped fangblenny, *Plagiotremus rhinorhynchus*, revealed that this species  
129 expresses five orthologous cone opsins in its eyes (Musilova et al. 2018 preprint). Given that  
130 amphibious species show morphological adaptations for vision in air, and that blenny visual  
131 opsins are extremely diverse, we hypothesized that aerial vision and exposure to full sunlight  
132 caused adaptations in the Salariini opsin gene repertoires. More specifically, due to the tissue  
133 damage UV-radiation inflicts, we expected to see a lack of *SWS1* expression in the eyes of  
134 these fishes. Instead, feeding on detritus and algae (Hundt et al. 2014b), which generally  
135 show strong reflection in the red due to their chlorophyll component (Stieb et al. 2017), as  
136 well as the use of red dorsal fins for aggressive and courtship displays (see Ord and Tonia

137 Hsieh 2011, Morgans and Ord 2013), might have caused amphibious and terrestrial blennies  
138 to have a more long-wavelength, *LWS*, dominated visual system.

139

## 140 **Material and Methods**

### 141 *Study species*

142 Adult blennies belonging to the Salariaini clade (Hundt et al. 2014a) were collected on snorkel  
143 or on foot with hand nets from several sites around the Indo-Pacific. Given that these  
144 blennies actively seek shade to avoid desiccation (Ord and Tonia Hsieh 2011), sampling  
145 either occurred in the early hours of the morning or late in the afternoon. Immediately post  
146 capture, their eyes were enucleated and stored on RNAlater (Life Technologies) for  
147 subsequent molecular analysis. From French Polynesia (FP), we collected Lined  
148 Rockskipper, *Istiblennius lineatus* (Mo'orea: 17°29'52.05"S, 149°45'17.24"W; November 8-  
149 10, 2013; N = 3), Blackmargin Rockskipper, *Praealticus caesius* (Mo'orea: 17°29'52.05"S,  
150 149°45'17.24"W; November 8-10, 2013; N = 3); and Marquesan Rockskipper, *Alticus*  
151 *simplicirrus* (Tahiti: 17°30'57.67"S, 149°24'25.14"W; November 14-15, 2013 N = 3). From  
152 the Seychelles (S), we collected *I. lineatus* (4°48'9"S, 53°30'60"E and 4°33'56"S,  
153 55°27'10"E; April 19 and 26, 2014; N = 3); Reef Margin Blenny, *Entomacrodus striatus*  
154 (4°48'9"S, 53°30'60"E; April 19 and 22, 2014; N = 3); and the Seychelles Rockskipper,  
155 *Alticus anjouanae* (4°33'56"S, 55°27'10"E; April 20, 2014; N = 3). A Jewelled Blenny,  
156 *Salarias fasciatus* (N = 1), was collected in May 2017 from Heron Island (23°44'S,  
157 151°91'E), Great Barrier Reef, Australia.

158 All experimental procedures were approved by Animal Ethics Committees from The  
159 University of New South Wales (11/36B and 13/21) and The University of Queensland  
160 (QBI/304/16). Fish were collected under permits issued by Protocole D'Accueil (10/10/2013)  
161 French Polynesia, Seychelles Bureau of Standards (#A0157), the Great Barrier Reef Marine  
162 Park Authority (G17/38160.1) and Queensland Fisheries (#180731).

163

### 164 *Transcriptome sequencing, quality filtering and de-novo assembly*

165 Retinae were dissected out of the eyecup and total RNA was extracted using an RNAeasy  
166 Mini Kit (Qiagen) including DNase treatment following the manufacturer's instructions.  
167 RNA integrity was checked using an Eukaryotic Total RNA Nano chip on a Bioanalyzer  
168 2100 (Agilent Technologies). All retinal transcriptomes, except for *S. fasciatus*, were  
169 sequenced in-house at the Queensland Brain Institute's sequencing facility, Brisbane,  
170 Australia. Sequencing libraries were prepared from 100-1,000 ng of total RNA using the

171 TruSeq total stranded mRNA Library Prep Kit protocol (Illumina, San Diego), and library  
172 concentrations were measured using a Qubit dsDNA BR Assay Kit (Thermo Fisher).  
173 Individual libraries were barcoded and up to 12 libraries/lane were pooled at equimolar  
174 ratios. Libraries were sequenced at PE125 on a HiSeq 2000 using Illumina's SBS chemistry  
175 version 4. The *S. fasciatus* library preparation (strand-specific, 250~300 bp insert) and  
176 sequencing (RNAseq HiSeq PE150) was outsourced to Novogene  
177 (<https://en.novogene.com/>).

178 Filtering and *de novo* assembly of retinal transcriptomes followed the protocol  
179 described in (de Busserolles et al. 2017). In short, raw-read transcriptomes were uploaded to  
180 the Genomics Virtual Laboratory (GVL 4.0.0) (Afgan et al. 2015) on the Galaxy Australia  
181 server (<https://galaxy-qlg.genome.edu.au/galaxy/>) and quality filtered using Trimmomatic  
182 (Galaxy v.0.32.2) (Bolger et al. 2014) before being *de novo* assembled using Trinity (Galaxy  
183 v.0.0.2) (Haas et al. 2013). Two transcriptomes per species were assembled, with the  
184 exception of *S. fasciatus* where only one individual was sequenced. Raw-read libraries and  
185 assemblies are available on the Sequence Read Archive (<https://www.ncbi.nlm.nih.gov/sra>)  
186 and the Transcriptome Shotgun Assembly Database  
187 (<https://www.ncbi.nlm.nih.gov/genbank/tsa/>), respectively (Table S1).

188

### 189 *Opsin gene mining, phylogenetic reconstructions and opsin gene expression*

190 Opsin gene mining and expression analyses followed the protocol described in de Busserolles  
191 et al. 2017. In short, putative Salariini opsin genes were searched for by mapping the  
192 assembled transcripts to the opsin coding sequences of the dusky dottyback, *Pseudochromis*  
193 *fuscus* (Cortesi et al. 2016) in Geneious v.11.0.2 ([www.geneious.com](http://www.geneious.com)). *Ps. fuscus* was chosen  
194 because it belongs to the closely related Pseudochromidae (Alfaro et al. 2018) and possesses  
195 an opsin gene repertoire containing representatives from all ancestral vertebrate opsin gene  
196 classes (Cortesi et al. 2016). Mapped contigs were extracted and compared to publicly  
197 available opsin gene sequences using BLASTN (<https://blast.ncbi.nlm.nih.gov/Blast.cgi>).  
198 Moreover, because *de novo* assembly based on short-read libraries is prone to create  
199 misassemblies (chimeric sequences), and/or to overlook closely related or lowly expressed  
200 gene copies, we used a second approach to account for all expressed Salariini visual opsins.  
201 This approach entailed the mapping of unassembled reads to the reference *Ps. fuscus* genes,  
202 followed by a manual extraction of gene copies using paired-end information to move from  
203 single polynucleotide polymorphism (SNP) to SNP along the gene. Extracted reads were *de*  
204 *novo* assembled and if necessary, their consensus was used as a species-specific template

205 against which unassembled reads were repeatedly re-mapped until the whole coding region  
206 could be extracted.

207 Salariini visual opsins were confirmed and assigned to specific opsin gene classes  
208 based on their phylogenetic relationships to a reference dataset obtained from GenBank  
209 (<https://www.ncbi.nlm.nih.gov/genbank/>) and Ensembl ([www.ensembl.org/](http://www.ensembl.org/)) (Fig. 1, Fig. S1).  
210 Gene coding regions were aligned using the L-INS-I settings as part of the Geneious MAFFT  
211 plugin v.1.3.7 (Kato and Standley 2013), and jModeltest v.2.1.10 (Darriba et al. 2012) was  
212 subsequently used to select the most appropriate model of sequence evolution based on the  
213 Akaike information criterion. MrBayes v.3.2.6 (Ronquist et al. 2012) run on the CIPRES  
214 platform (Miller et al. 2010) was then used to infer the phylogenetic relationship between  
215 opsin genes using the following parameter settings: GTR+I+G model; two independent  
216 MCMC searches with four chains each; 10 million generations per run; 1000 generations  
217 sample frequency; and, 25% burn-in. Phylogenies were also reconstructed using GTR+G  
218 models, to account for the possibility of variable sites, however, no substantial differences in  
219 tree structure or node support could be found. Raw trees from either approach and  
220 corresponding data alignments have been deposited in Dryad (<https://datadryad.org/>), and  
221 GenBank accession numbers for the relevant genes are given either in Fig. S1, or in Table S1.

222 Quantitative opsin gene expression was measured by mapping the unassembled reads  
223 against the extracted opsin coding regions for each species as per de Busserolles et al. 2017.  
224 We then compared the rod opsin expression to the combined cone opsin expression, the  
225 proportional expression of each cone opsin gene to the combined cone opsin expression and  
226 finally, the proportional expressions of single (*SWS2A $\alpha$* , *SWS2A $\beta$* ) and double cone (*RH2A-1*,  
227 *LWS*) genes amongst themselves (Table 2). Single and double cone opsin gene expression for  
228 each species was then plotted onto the Salariini phylogeny taken from Ord and Cooke, 2016  
229 (Fig. 2). Moreover, we also quantified the expression of *cytochrome P450 family 27*  
230 *subfamily c member 1* (*cyp27c1*) by comparing its gene expression to the total opsin  
231 expression of fishes. The zebrafish *cyp27c1* ortholog converts vitamin A<sub>1</sub>-based chromophore  
232 to the longer shifted A<sub>2</sub>-chromophore (Enright et al. 2015) and A<sub>2</sub> has previously been  
233 reported in the peacock blenny, *Salaria pavo*, based on microspectrophotometry results  
234 (White et al. 2004).

235

### 236 *Opsin gene sequence analysis and spectral sensitivity predictions*

237 Opsin gene coding sequences were aligned using the L-INS-I settings in MAFFT (Geneious  
238 plugin v.1.3.7) (Kato and Standley 2013) and gene specific opsin trees were reconstructed

239 using RAxML v.8.2.11 (Geneious plugin v.3.0) (Stamatakis 2014), a GTR+G model and  
240 1000 bootstraps to generate the support values for majority-rule consensus trees (Fig. S2).  
241 The alignments and corresponding trees were then used to test for site-specific positive  
242 selection using codeml in PAML (Yang 2007) as described in detail by (Hofmann et al.  
243 2012). Briefly, codeml was run on the graphical user interface pamlX v.1.3.1. (Xu and Yang  
244 2013) using likelihood ratio tests (LRT) to compare M1a vs. M2 and M8 vs. M8a. Bayesian  
245 Empirical Bayes (BEB) criteria (Yang et al. 2005) were subsequently applied to identify  
246 specific amino acid sites under positive selection in case of significant LRTs (Table S2).  
247 Next, we imported the alignments into MEGA7 (Kumar et al. 2016), which was used to  
248 calculate synonymous (ds) and nonsynonymous substitution rates (dn) using the Nei-  
249 Gojobori method (Jukes-Cantor distances)(Table 1).

250 Salariini opsin amino acid sequences were then aligned to bovine rhodopsin  
251 (Palczewski et al. 2000) to assess their variability within the transmembrane and the retinal  
252 binding pocket sites as well as at known opsin spectral tuning sites (Fasick and Robinson  
253 1998, Hunt et al. 2001, Yokoyama 2008, Dungan et al. 2015). Since the dn/ds ratio indicated  
254 low variability between Salariini opsins, we extended this analysis to also include the opsins  
255 of the rock-pool blenny, *Parablennius parvicornis* (Musilova et al. 2018 preprint), as a more  
256 distantly related obligate aquatic species from the sister clade of the Parablenniini (Hundt et  
257 al. 2014a). Amino acid substitutions were assessed for each opsin gene amongst Salariini  
258 species, and between the Salariini and *Pa. parvicornis* taking specific note of sites that differ  
259 in polarity between species (as per Hofmann et al. 2012) (Table 1 and Table S3). Finally, we  
260 inferred the spectral sensitivities of the Salariini opsins based on changes at known spectral  
261 tuning sites compared to the well documented opsin sequences of *Ps. fuscus* (Cortesi et al.  
262 2016) (Table S3). Individual sites are referred to according to their location relative to bovine  
263 rhodopsin.

264

## 265 **Results**

### 266 *Opsin gene phylogeny and gene expression*

267 Retinal transcriptomes from our studied species contained six cone and one rod opsin (*RHI*)  
268 gene. Phylogenetic reconstruction revealed two blue-sensitive *SWS2A* copies (*SWS2A $\alpha$* ,  
269 *SWS2A $\beta$* ), three green-sensitive *RH2* copies (*RH2A-1*, *RH2A-2* and *RH2B*), and one red-  
270 sensitive *LWS* gene (Fig. 1, Fig. S1, Table S1).

271 Rod opsin expression was generally much higher than cone opsin expression (> 73%  
272 of total opsin expression), except in *E. striatus* and *I. lineatus* (S) where rod and cone opsin



273 genes were more equally expressed (~ 50% of total opsin expression each). In terms of cone  
274 opsin expression, single cone genes (*SWS2A $\alpha$*  + *SWS2A $\beta$* ) accounted for ~ 10 – 15% of total  
275 cone opsin expression, except for one *Pr. caesius* individual which had 24.4 % single cone  
276 gene expression (Table 2). Comparing single and double cone expression separately, the  
277 single cone specific *SWS2A* paralogs were expressed at similar ratios (~ 40 – 60 % each)  
278 within the subclade containing the two terrestrial *Alticus* spp. as well as the immediate sister  
279 group to this genus, the mildly-amphibious *Pr. caesius*. In the remaining mildly-amphibious,  
280 amphibious and aquatic species, *SWS2A $\beta$*  was primarily expressed (> 83%) (Fig. 2, Table 2).  
281 Neither the UV-sensitive *SWS1* nor the violet-sensitive *SWS2B* single cone genes were found  
282 to be expressed in the retinae of adult Salariini. Considering double cone gene expression, all  
283 blennies were found to express high amounts of *RH2A-1* and *LWS* (~ 40 – 60% each)(Fig. 2,  
284 Table 2). *RH2A-2*, on the other hand, was found to be lowly expressed (< 0.1% of total cone  
285 opsin expression) only allowing full coding sequence reconstruction for *A. simplicirrus* and  
286 partial sequence reconstructions for *Pr. caesius* and *I. lineatus* (Fig. 1). *S. fasciatus* was the  
287 only Salariini species with low levels of *RH2B* expression (< 0.1% of total cone opsin  
288 expression). Therefore, gene expression for *RH2A-2* and *RH2B* are unlikely to be relevant for  
289 adult Salariini vision and have been excluded from all further analyses (data not shown).  
290 *cyp27c1* was found to be lowly expressed in all blennies at < 0.5% compared to total opsin  
291 expression (Table 2).

292

### 293 *Opsin gene diversity, selection analysis and predicted spectral sensitivities*

294 The Salariini opsin genes were highly similar both when compared between species within  
295 the clade, and when compared to the more distant *Pa. parvicornis* sister species (Table 1).  
296 Overall, *SWS2A $\alpha$*  (13/22 amino acid substitutions within Salariini/against *Pa. parvicornis*)  
297 had the highest and *RH2A-1* (3/11) the lowest number of amino acid substitutions within  
298 transmembrane- and retinal binding pocket sites. Only a few of these amino acid substitutions  
299 were found to occur in potential spectral tuning sites, namely those sites that have previously  
300 been identified to change the spectral sensitivity of opsin pigments and/or substitutions that  
301 incorporated changes in polarity (Tables 1 and S3). Reflective of the low variability between  
302 the Salariini genes, using PAML revealed that none of the Salariini genes are under positive  
303 selection (Table S2).

304 Most Salariini opsin genes showed no changes in key tuning sites when compared to  
305 their *Ps. fuscus* orthologs (Cortesi et al. 2016; Table S3). Consequently, assuming a purely A<sub>1</sub>  
306 chromophore based visual system, the peak spectral sensitivity ( $\lambda_{\max}$ ) for the Salariini

307 SWS2A $\alpha$  was estimated to be at 448 nm. For SWS2A $\beta$  we found one substitution at site  
308 T269A. The reverse substitution i.e. A269T, causes a 6 nm red-shift in  $\lambda_{\max}$  (Yokoyama  
309 2008) and we therefore assumed a similar shift but in the opposite direction in our case. Thus,  
310 the Salariaiini SWS2A $\beta$  was estimated to have a 451 nm  $\lambda_{\max}$ . The Salariaiini RH2A-1 was found  
311 to be identical in key spectral tuning sites to the *Ps. fuscus* RH2A $\alpha$  and its estimated  $\lambda_{\max}$   
312 therefore to be 524 nm. The Salariaiini LWS (561 nm  $\lambda_{\max}$ ) was also identical in tuning sites to  
313 its *Ps. fuscus* ortholog, expect for *P. ceaseus* (554 nm  $\lambda_{\max}$ ) where the substitution S164A is  
314 likely to have blue shifted the spectral sensitivity by 7 nm (Yokoyama 2008). Finally, the  
315 Salariaiini RH1 (500 nm  $\lambda_{\max}$ ) showed one substitution at N83D likely to cause a 2 nm red-shift  
316 (Yokoyama 2008) and in the case of the *S. fasciatus* RH1 (501 – 503 nm  $\lambda_{\max}$ ), showed a  
317 second substitution at A124G further red-shifting this visual pigment by 1 – 3 nm (Hunt et al.  
318 2001).

319

## 320 Discussion

321 In this study, we investigated the molecular evolution of vision in fishes from the Salariaiini  
322 division of blennies, which have transitioned from water to land. First, we sequenced the  
323 retinal transcriptomes of six species classified as fully aquatic (*S. fasciatus*), mildly  
324 amphibious (*I. lineatus* and *Pr. caesius*), amphibious (*E. striatus*), and fully terrestrial (*A.*  
325 *simplicirrus* and *A. anjouanae*) (Ord and Cooke 2016; Fig. 1). We found that within their  
326 eyes, blennies express one rod opsin (*RHI*) and between three and four cone opsins (Fig. 2)  
327 independent of habitat or geographic region (i.e. South Pacific vs. Indian Ocean). *RHI*  
328 expression in fishes shows a strong diurnal pattern, starting with high expression in the  
329 morning and gradually decreasing as the day goes on (e.g., Korenbrot and Fernald 1989,  
330 Stieb et al. 2016). Hence, differences in sampling time i.e. early morning versus late  
331 afternoon, most likely explains the discrepancy of rod to cone opsin expression found in this  
332 study (Table 2).

333 Regarding the cone opsins, all Salariaiini species expressed the double cone genes  
334 sensitive to the red (*LWS*) and the green (*RH2A-1*) part of the light spectrum. We also found a  
335 second *RH2A* paralog in the genera *Alticus*, *Praealticus* and *Istiblennius* (Fig. 1). The *RH2A-*  
336 *2* gene was not expressed in the closely related *S. fasciatus* nor is it present in the genome of  
337 the more distantly related *Pa. parvicornis* (Musilova et al. 2018 preprint). One could  
338 therefore assume that this *RH2A* duplication is specific to the clade containing the  
339 amphibious and terrestrial Salariaiini species (Ord and Cooke 2016). However, based on our  
340 phylogenetic reconstruction, *RH2A-2* is basal to a greater *RH2A* clade which includes gene

341 orthologs from dottybacks and cichlids (Fig. S1). Both cichlids (Escobar-Camacho et al.  
342 2016) and dottybacks (Cortesi et al. 2016) have two *RH2A* duplicates which have undergone  
343 widespread gene conversion and consequently cluster closely together within  
344 species/families. The blenny *RH2A* copies, on the other hand, appear unaffected by gene  
345 conversion. Rather than being Salariini specific then, it is likely that *RH2A-2* is the blenny  
346 ortholog of an ancestral *RH2A* duplication and that *Pa. parvicornis* has lost the copy  
347 secondarily. As more and more fish genomes become available (e.g. Musilova et al. 2018  
348 preprint), the patterns surrounding *RH2* evolution are likely to become clear in the near  
349 future.

350 Finally, there was a strong phylogenetic signal in the expression of the blue-sensitive  
351 *SWS2A* duplicates: only the clade containing the two *Alticus* species and *Pr. caesius*  
352 expressed both of the copies at a similar ratio, while the remaining Salariini species mainly  
353 expressed the slightly longer tuned *SWS2A $\beta$*  copy (Fig. 2). Whether this difference in  
354 expression is ecologically significant or whether it is the result of a phylogenetic inertia  
355 remains to be investigated. Given that the predicted  $\lambda_{\max}$  for the two *SWS2A* paralogs is only  
356 3 nm apart, we currently favour the latter scenario. As such, based on cone opsin expression  
357 and chromophore A<sub>1</sub>-derived spectral sensitivity predictions, Salariini blennies appear to  
358 have a well-developed, potentially trichromatic, colour vision sense which reaches across the  
359 visible light spectrum ranging from 448 - 561 nm in  $\lambda_{\max}$ .

360 Our study species live in shallow reef environments, are amphibious or have left the  
361 aquatic realm altogether. The light environment these species experience differs depending  
362 on their habitat with both an increase in light intensity and in the proportion of UV and red  
363 wavelengths when moving into shallower water and finally onto land (see e.g., Marshall et al.  
364 2003). Opsin gene expression in fishes has been shown to be influenced by changes in light  
365 environment with water depth (e.g., Stieb et al. 2016), and degree of suspended organic  
366 material (e.g., Fuller et al. 2005). However, our data shows that there are no large differences  
367 in opsin gene expression between Salariini species from different habitats (Fig. 2; Table 2).  
368 All of the species appear to have red-shifted visual systems hinting towards the importance of  
369 detecting longer-wavelengths of light for survival. Mounting evidence suggests that long-  
370 wavelength reception in coral reef fishes is especially beneficial when feeding on algae or  
371 similar chlorophyll containing organic matter, which strongly reflect the red part of the light  
372 spectrum (for a recent review on the topic see Marshall et al. 2018). It is also possible that the  
373 red-orange dorsal fin that appears unique to the terrestrial species (TJ Ord, unpublished data)  
374 has evolved to exploit the pre-existing (ancestral) visual state of seeing red as a means of

375 maximizing the efficiency of territorial and courtship signalling on land (Bhikajee and Green  
376 2002, Shimizu et al. 2006, Ord and Tonia Hsieh 2011). The red-orange coloration of the  
377 dorsal fin of terrestrial blennies has been shown to be highly chromatically contrasting  
378 against the typical environmental background found on land (Morgans and Ord 2013).  
379 Similarly, sexually selected red-orange colour signals evolving in response to an innate red  
380 sensory bias in conspecific receivers has also been suggested for a number of other fish  
381 species (e.g., see Rodd et al. 2002, Smith et al. 2004, Seehausen et al. 2008).

382 It is notable that none of the species was found to express the UV-sensitive *SWS1*  
383 gene or the violet-sensitive *SWS2B* gene. While it is possible that *SWS2B* was lost in the  
384 ancestor of all blennies (Cortesi et al. 2015), *SWS1* is present, at least on the genomic level, in  
385 *Pa. parvicornis* (Musilova et al. 2018 preprint). Salariini blennies could have lost *SWS1*  
386 independently or alternatively, *SWS1* might simply not be expressed in adult blennies.  
387 Instead, *SWS1* and also the *RH2A-2* and *RH2B* paralogs, might be used at different  
388 developmental stages, a common feature of opsin gene expression in fishes (e.g., Spady et al.  
389 2006, Carleton et al. 2008, Cortesi et al. 2016, Savelli et al. 2018). Supporting the potential  
390 use of *SWS1* at earlier life stages, Siebeck and Marshall (2007) found that adult Salariini  
391 blennies have UV blocking eyes while larval stages have UV to violet transmitting eyes. In  
392 an interesting parallel, mudskippers (Gobiidae) (You et al. 2014) and the Asian swamp eel  
393 (*Monopterus albus*) (Musilova et al. 2018 preprint), both of which are amphibious, have lost  
394 their *SWS1* gene with the swamp eel further missing its *SWS2B* copy (Cortesi et al. 2015). It  
395 is possible that the tissue damage UV-radiation induces has led to the convergent loss and/or  
396 the inexpression of the shorter-shifted *SWS* genes in amphibious species more generally.

397 Overall, opsin orthologs were highly conserved between Salariini species, and only  
398 very few changes in key tuning sites potentially shifting spectral sensitivities could be found  
399 (Table 1 and Table S3). Therefore, neither at the opsin-sequence nor at the expression level  
400 were there any apparent adaptations to the transition from water to land. This is surprising  
401 since morphological adaptations of the visual system when moving out-of-water are common  
402 (Sayer 2005). It remains possible that instead of relying on their opsins, Salariini blennies  
403 change the chromophore part of the photopigment. For example, most amphibians use red-  
404 shifted chromophore A<sub>2</sub> based visual systems during their aquatic life stages, but change to a  
405 blue-shifted A<sub>1</sub> based visual system after metamorphosis and moving onto land (Wilt 1959,  
406 Liebman and Entine 1968, Bridges 1972). Most Salariini species were found to lowly express  
407 *Cyp27c1*, the enzyme responsible for the A<sub>1</sub> to A<sub>2</sub> switch (Enright et al. 2015) (Table 2). It  
408 remains to be seen if the use of these chromophores differs between habitats.

409 In summary, we found no apparent molecular adaptations in terms of opsin gene  
410 sequence variability and expression in terrestrial blennies when compared to their amphibious  
411 and aquatic sister species. On the contrary, our data suggests that Salariini blennies evolved  
412 visual systems early on that were ideal to conquer shallow reef and intertidal habitats, and no  
413 further molecular adaptations have been made for life on land.

414

#### 415 **Acknowledgements**

416 We would like to thank Sara Stieb and Fanny de Busserolles for assistance with RNA  
417 extractions and specimen collection, and Janette Edson from the Queensland Brain Institute's  
418 sequencing facility for library preparation and RNA sequencing.

419

#### 420 **Competing Interests**

421 The authors declare no competing interests.

422

#### 423 **Funding**

424 F.C. was supported by a Swiss National Science Foundation Early Postdoc Mobility  
425 Fellowship (165364) and a UQ Development Fellowship. This study was also funded by a  
426 Discovery Project grant from the Australian Research Council to T.J.O. (DP120100356).

427

#### 428 **Author Contributions**

429 T.J.O. conceived the study and designed the experiments together with F.C. and K.L.C.  
430 T.J.O., G.M.C. and F.C. collected the specimens. F.C. performed the experiments, analysed  
431 the data, and wrote the initial manuscript. All authors reviewed and approved the final  
432 version of the manuscript.

433

#### 434 **Data Accessibility**

435 Raw-read transcriptomes (SRA tba) and single gene sequences (#tba) are available through  
436 GenBank (<https://www.ncbi.nlm.nih.gov/genbank/>). Gene alignments and single gene  
437 phylogenies can be accessed through Dryad (#tba). All other data is given either in the main  
438 manuscript or the supplementary material.

439

## 440 References

- 441 Afgan, E., C. Sloggett, N. Goonasekera, I. Makunin, D. Benson, M. Crowe, S. Gladman, Y.  
442 Kowsar, M. Pheasant, and R. Horst. 2015. Genomics virtual laboratory: a practical  
443 bioinformatics workbench for the cloud. *PLoS ONE* **10**:e0140829.
- 444 Alfaro, M. E., B. C. Faircloth, R. C. Harrington, L. Sorenson, M. Friedman, C. E. Thacker, C.  
445 H. Oliveros, D. Černý, and T. J. Near. 2018. Explosive diversification of marine  
446 fishes at the Cretaceous–Palaeogene boundary. *Nature Ecology & Evolution* **2**:688-  
447 696.
- 448 Bhikajee, M., and J. Green. 2002. Behaviour and habitat of the Indian Ocean amphibious  
449 blenny, *Alticus monochrus*. *African Zoology* **37**:221-230.
- 450 Bolger, A. M., M. Lohse, and B. Usadel. 2014. Trimmomatic: a flexible trimmer for Illumina  
451 sequence data. *Bioinformatics* **30**:2114-2120.
- 452 Bridges, C. 1972. The rhodopsin-porphyrin visual system. Pages 417-480  
453 *Photochemistry of vision*. Springer.
- 454 Brunt, E. M., A. J. Turko, G. R. Scott, and P. A. Wright. 2016. Amphibious fish jump better  
455 on land after acclimation to a terrestrial environment. *Journal of Experimental*  
456 *Biology* **219**:3204.
- 457 Carleton, K. L., T. C. Spady, J. T. Streelman, M. R. Kidd, W. N. McFarland, and E. R. Loew.  
458 2008. Visual sensitivities tuned by heterochronic shifts in opsin gene expression.  
459 *BMC Biology* **6**:22.
- 460 Chew, S. F., and Y. K. Ip. 2014. Excretory nitrogen metabolism and defence against  
461 ammonia toxicity in air-breathing fishes. *Journal of Fish Biology* **84**:603-638.
- 462 Colombini, I., R. Berti, A. Ercolini, A. Nocita, and L. Chelazzi. 1995. Environmental factors  
463 influencing the zonation and activity patterns of a population of *Periophthalmus*  
464 *sobrinus* Eggert in a Kenyan mangrove. *Journal of Experimental Marine Biology and*  
465 *Ecology* **190**:135-149.
- 466 Cortesi, F., Z. Musilová, S. M. Stieb, N. S. Hart, U. E. Siebeck, K. L. Cheney, W. Salzburger,  
467 and N. J. Marshall. 2016. From crypsis to mimicry: changes in colour and the  
468 configuration of the visual system during ontogenetic habitat transitions in a coral reef  
469 fish. *Journal of Experimental Biology* **219**:2545-2558.
- 470 Cortesi, F., Z. Musilová, S. M. Stieb, N. S. Hart, U. E. Siebeck, M. Malmstrøm, O. K.  
471 Tørresen, S. Jentoft, K. L. Cheney, N. J. Marshall, K. L. Carleton, and W. Salzburger.  
472 2015. Ancestral duplications and highly dynamic opsin gene evolution in percomorph  
473 fishes. *Proceedings of the National Academy of Sciences* **112**:1493-1498.
- 474 Darriba, D., G. L. Taboada, R. Doallo, and D. Posada. 2012. jModelTest 2: more models,  
475 new heuristics and parallel computing. *Nature methods* **9**:772-772.
- 476 Davenport, J., and M. Sayer. 1986. Ammonia and urea excretion in the amphibious teleost  
477 *Blennius pholis* (L.) in sea-water and in air. *Comparative Biochemistry and*  
478 *Physiology Part A: Physiology* **84**:189-194.
- 479 de Busserolles, F., F. Cortesi, J. V. Helvik, W. I. Davies, R. M. Templin, R. K. Sullivan, C.  
480 T. Michell, J. K. Mountford, S. P. Collin, and X. Irigoien. 2017. Pushing the limits of  
481 photoreception in twilight conditions: the rod-like cone retina of the deep-sea  
482 pearlsides. *Science Advances* **3**:eaao4709.
- 483 Dungan, S. Z., A. Kosyakov, and B. S. Chang. 2015. Spectral tuning of killer whale (*Orcinus*  
484 *orca*) rhodopsin: evidence for positive selection and functional adaptation in a  
485 cetacean visual pigment. *Molecular Biology and Evolution* **33**:323-336.
- 486 Enright, J. M., M. B. Toomey, S.-y. Sato, S. E. Temple, J. R. Allen, R. Fujiwara, V. M.  
487 Kramlinger, L. D. Nagy, K. M. Johnson, Y. Xiao, M. J. How, S. L. Johnson, N. W.  
488 Roberts, V. J. Kefalov, P. F. Guengerich, and J. C. Corbo. 2015. Cyp27c1 red-shifts

- 489 the spectral sensitivity of photoreceptors by converting vitamin A 1 into A 2. *Current*  
490 *Biology* **25**:3048-3057.
- 491 Escobar-Camacho, D., E. Ramos, C. Martins, and K. L. Carleton. 2017. The Opsin Genes of  
492 Amazonian Cichlids. *Molecular Ecology* **26**:1343-4356.
- 493 Fasick, J. I., and P. R. Robinson. 1998. Mechanism of spectral tuning in the dolphin visual  
494 pigments. *Biochemistry* **37**:433-438.
- 495 Fuller, R. C., K. L. Carleton, J. M. Fadool, T. C. Spady, and J. Travis. 2005. Genetic and  
496 environmental variation in the visual properties of bluefin killifish, *Lucania goodei*.  
497 *Journal of Evolutionary Biology* **18**:516-523.
- 498 Fuller, R. C., L. A. Noa, and R. S. Strellner. 2010. Teasing apart the many effects of lighting  
499 environment on opsin expression and foraging preference in bluefin killifish. *The*  
500 *American Naturalist* **176**:1-13.
- 501 Haas, B. J., A. Papanicolaou, M. Yassour, M. Grabherr, P. D. Blood, J. Bowden, M. B.  
502 Couger, D. Eccles, B. Li, and M. Lieber. 2013. De novo transcript sequence  
503 reconstruction from RNA-seq using the Trinity platform for reference generation and  
504 analysis. *Nature Protocols* **8**:1494.
- 505 Hofmann, C. M., N. J. Marshall, K. Abdilleh, Z. Patel, U. E. Siebeck, and K. L. Carleton.  
506 2012. Opsin evolution in damselfish: convergence, reversal, and parallel evolution  
507 across tuning sites. *Journal of Molecular Evolution* **75**:79-91.
- 508 Hofmann, C. M., K. E. O'Quin, N. J. Marshall, T. W. Cronin, O. Seehausen, and K. L.  
509 Carleton. 2009. The eyes have it: regulatory and structural changes both underlie  
510 cichlid visual pigment diversity. *PLoS biology* **7**:e1000266.
- 511 Hsieh, S.-T. T. 2010. A locomotor innovation enables water-land transition in a marine fish.  
512 *PLoS ONE* **5**:e11197.
- 513 Hundt, P. J., S. P. Iglésias, A. S. Hoey, and A. M. Simons. 2014a. A multilocus molecular  
514 phylogeny of combtooth blennies (Percomorpha: Blennioidei: Blenniidae): multiple  
515 invasions of intertidal habitats. *Molecular Phylogenetics and Evolution* **70**:47-56.
- 516 Hundt, P. J., Y. Nakamura, and K. Yamaoka. 2014b. Diet of combtooth blennies (Blenniidae)  
517 in Kochi and Okinawa, Japan. *Ichthyological Research* **61**:76-82.
- 518 Hundt, P. J., and A. M. Simons. 2018. Extreme dentition does not prevent diet and tooth  
519 diversification within combtooth blennies (Ovalentaria: Blenniidae). *Evolution*  
520 **72**:930-943.
- 521 Hunt, D. M., K. S. Dulai, J. C. Partridge, P. Cottrill, and J. K. Bowmaker. 2001. The  
522 molecular basis for spectral tuning of rod visual pigments in deep-sea fish. *Journal of*  
523 *Experimental Biology* **204**:3333-3344.
- 524 Hunt, D. M., M. W. Hankins, S. P. Collin, and N. J. Marshall. 2014. Evolution of visual and  
525 non-visual pigments. Springer.
- 526 Katoh, K., and D. M. Standley. 2013. MAFFT multiple sequence alignment software version  
527 7: improvements in performance and usability. *Molecular Biology and Evolution*  
528 **30**:772-780.
- 529 Kawano, S. M., and R. W. Blob. 2013. Propulsive forces of mudskipper fins and salamander  
530 limbs during terrestrial locomotion: implications for the invasion of land. *Integrative*  
531 *and Comparative Biology* **53**:283-294.
- 532 Korenbrot, J. I., and R. D. Fernald. 1989. Circadian rhythm and light regulate opsin mRNA in  
533 rod photoreceptors. *Nature* **337**:454.
- 534 Kumar, S., G. Stecher, and K. Tamura. 2016. MEGA7: molecular evolutionary genetics  
535 analysis version 7.0 for bigger datasets. *Molecular Biology and Evolution* **33**:1870-  
536 1874.
- 537 Liebman, P., and G. Entine. 1968. Visual pigments of frog and tadpole (*Rana pipiens*).  
538 *Vision Research* **8**:761-775.

- 539 Lin, J.-J., F.-Y. Wang, W.-H. Li, and T.-Y. Wang. 2017. The rises and falls of opsin genes in  
540 59 ray-finned fish genomes and their implications for environmental adaptation.  
541 *Scientific Reports* **7**:15568.
- 542 Luehrmann, M., F. Cortesi, K. L. Cheney, F. De Busserolles, and N. J. Marshall. in review.  
543 Microhabitat partitioning correlates with eye morphology and opsin gene expression  
544 in coral reef cardinalfishes (Apogonidae)
- 545 MacIver, M. A., L. Schmitz, U. Mugan, T. D. Murphey, and C. D. Mobley. 2017. Massive  
546 increase in visual range preceded the origin of terrestrial vertebrates. *Proceedings of*  
547 *the National Academy of Sciences* **114**:2374-2384.
- 548 Mandic, M., K. A. Sloman, and J. G. Richards. 2009. Escaping to the surface: a  
549 phylogenetically independent analysis of hypoxia-induced respiratory behaviors in  
550 sculpins. *Physiological and Biochemical Zoology* **82**:730-738.
- 551 Marshall, N. J., F. Cortesi, F. de Busserolles, U. E. Siebeck, and K. L. Cheney. 2018. Colours  
552 and colour vision in reef fishes: past, present and future research directions. *Journal of*  
553 *Fish Biology*:doi:<https://doi.org/10.1111/jfb.13849>
- 554 Marshall, N. J., K. Jennings, W. N. McFarland, E. R. Loew, G. S. Losey, and W. L.  
555 Montgomery. 2003. Visual biology of hawaiian coral reef fishes. III. Environmental  
556 light and an integrated approach to the ecology of reef fish vision. *Copeia* **2003**:467-  
557 480.
- 558 Miller, M. A., W. Pfeiffer, and T. Schwartz. 2010. Creating the CIPRES Science Gateway for  
559 inference of large phylogenetic trees. Pages 1-8 *in* Gateway Computing Environments  
560 Workshop (GCE), 2010. IEEE.
- 561 Morgans, C. L., G. M. Cooke, and T. J. Ord. 2014. How populations differentiate despite  
562 gene flow: sexual and natural selection drive phenotypic divergence within a land  
563 fish, the Pacific leaping blenny. *BMC Evolutionary Biology* **14**:97.
- 564 Morgans, C. L., and T. J. Ord. 2013. Natural selection in novel environments: predation  
565 selects for background matching in the body colour of a land fish. *Animal Behaviour*  
566 **86**:1241-1249.
- 567 Musilova, Z., F. Cortesi, M. Matschiner, W. I. L. Davies, S. M. Stieb, F. de Busserolles, M.  
568 Malmstroem, O. K. Toerresen, J. K. Mountford, R. Hanel, K. S. S. Jakobsen, K. L.  
569 Carleton, S. Jentoft, J. N. Marshall, and W. Salzburger. 2018. Vision using multiple  
570 distinct rod opsins in deep-sea fishes. *bioRxiv*,  
571 424895:doi:<https://doi.org/10.1101/424895>
- 572 Ord, T. J., and G. M. Cooke. 2016. Repeated evolution of amphibious behavior in fish and its  
573 implications for the colonization of novel environments. *Evolution* **70**:1747-1759.
- 574 Ord, T. J., T. C. Summers, M. M. Noble, and C. J. Fulton. 2017. Ecological release from  
575 aquatic predation is associated with the emergence of marine blenny fishes onto land.  
576 *The American Naturalist* **189**:570-579.
- 577 Ord, T. J., and S. Tonia Hsieh. 2011. A highly social, land-dwelling fish defends territories in  
578 a constantly fluctuating environment. *Ethology* **117**:918-927.
- 579 Palczewski, K., T. Kumasaka, T. Hori, C. A. Behnke, H. Motoshima, B. A. Fox, I. L. Trong,  
580 D. C. Teller, T. Okada, R. E. Stenkamp, M. Yamamoto, and M. Miyano. 2000.  
581 Crystal structure of rhodopsin: a G protein-coupled receptor. *Science* **289**:739-745.
- 582 Platt, E. R., and T. J. Ord. 2015. Population Variation in the Life History of a Land Fish,  
583 *Alticus arnoldorum*, and the Effects of Predation and Density. *PLoS ONE*  
584 **10**:e0137244.
- 585 Regan, K. S., M. G. Jonz, and P. A. Wright. 2011. Neuroepithelial cells and the hypoxia  
586 emersion response in the amphibious fish *Kryptolebias marmoratus*. *Journal of*  
587 *Experimental Biology* **214**:2560-2568.



- 588 Rodd, F. H., A. Hughes Kimberly, F. Grether Gregory, and T. Baril Colette. 2002. A possible  
589 non-sexual origin of mate preference: are male guppies mimicking fruit? Proceedings  
590 of the Royal Society of London. Series B: Biological Sciences **269**:475-481.
- 591 Ronquist, F., M. Teslenko, P. van der Mark, D. L. Ayres, A. Darling, S. Höhna, B. Larget, L.  
592 Liu, M. A. Suchard, and J. P. Huelsenbeck. 2012. MrBayes 3.2: efficient Bayesian  
593 phylogenetic inference and model choice across a large model space. Systematic  
594 Biology **61**:539-542.
- 595 Rossi, G. S., A. J. Turko, and P. A. Wright. 2018. Oxygen drives skeletal muscle remodeling  
596 in an amphibious fish out of water. Journal of Experimental Biology **221**:jeb180257.
- 597 Sandkam, B., B. Dalton, F. Breden, K. Carleton, and H. e. B. Fuller. 2018. Reviewing guppy  
598 color vision: integrating the molecular and physiological variation in visual tuning of  
599 a classic system for sensory drive. Current Zoology **64**:535-545.
- 600 Savelli, I., I. N. Flamarique, T. Iwanicki, and J. S. Taylor. 2018. Parallel opsin switches in  
601 multiple cone types of the starry flounder retina: tuning visual pigment composition  
602 for a demersal life style. Scientific Reports **8**:4763.
- 603 Sayer, M. D. 2005. Adaptations of amphibious fish for surviving life out of water. Fish and  
604 Fisheries **6**:186-211.
- 605 Seehausen, O., Y. Terai, I. S. Magalhaes, K. L. Carleton, H. D. Mrosso, R. Miyagi, I. van der  
606 Sluijs, M. V. Schneider, M. E. Maan, H. Tachida, H. Imai, and N. Okada. 2008.  
607 Speciation through sensory drive in cichlid fish. Nature **455**:620-626.
- 608 Shimizu, N., Y. Sakai, H. Hashimoto, and K. Gushima. 2006. Terrestrial reproduction by the  
609 air-breathing fish *Andamia tetradactyla* (Pisces; Blenniidae) on supralittoral reefs.  
610 Journal of Zoology **269**:357-364.
- 611 Siebeck, U. E., and N. J. Marshall. 2007. Potential ultraviolet vision in pre-settlement larvae  
612 and settled reef fish - A comparison across 23 families. Vision Research **47**:2337-  
613 2352.
- 614 Smith, C., I. Barber, J. Wootton Robert, and L. Chittka. 2004. A receiver bias in the origin of  
615 three-spined stickleback mate choice. Proceedings of the Royal Society of London.  
616 Series B: Biological Sciences **271**:949-955.
- 617 Smith, H. W. 1930. Metabolism of the lung-fish, *Protopterus aethiopicus*. Journal of  
618 Biological Chemistry **88**:97-130.
- 619 Spady, T. C., J. W. Parry, P. R. Robinson, D. M. Hunt, J. K. Bowmaker, and K. L. Carleton.  
620 2006. Evolution of the cichlid visual palette through ontogenetic subfunctionalization  
621 of the opsin gene arrays. Molecular Biology and Evolution **23**:1538-1547.
- 622 Stamatakis, A. 2014. RAxML version 8: a tool for phylogenetic analysis and post-analysis of  
623 large phylogenies. Bioinformatics **30**:1312-1313.
- 624 Stieb, S. M., K. L. Carleton, F. Cortesi, N. J. Marshall, and W. Salzburger. 2016. Depth  
625 dependent plasticity in opsin gene expression varies between damselfish  
626 (Pomacentridae) species. Molecular Ecology **25**:3645-3661.
- 627 Stieb, S. M., F. Cortesi, L. Sueess, K. L. Carleton, W. Salzburger, and N. J. Marshall. 2017.  
628 Why UV-and red-vision are important for damselfish (Pomacentridae): structural and  
629 expression variation in opsin genes. Molecular Ecology **26**:1323-1342.
- 630 Sturla, M., P. Paola, G. Carlo, M. M. Angela, and U. B. Maria. 2002. Effects of induced  
631 aestivation in *Protopterus annectens*: a histomorphological study. Journal of  
632 Experimental Zoology **292**:26-31.
- 633 Swamynathan, S. K., M. Crawford, W. G. Robison JR, J. Kanungo, and J. Piatigorsky. 2003.  
634 Adaptive differences in the structure and macromolecular compositions of the air and  
635 water corneas of the “four-eyed” fish (*Anableps anableps*). The FASEB journal  
636 **17**:1996-2005.

- 637 Turko, A. J., D. Kültz, D. Fudge, R. P. Croll, F. M. Smith, M. R. Stoyek, and P. A. Wright.  
638 2017. Skeletal stiffening in an amphibious fish out of water is a response to increased  
639 body weight. *Journal of Experimental Biology* **220**:3621-3631.
- 640 Wald, G. 1968. The molecular basis of visual excitation. *Nature* **219**:800.
- 641 White, E., D. Goncalves, J. C. Partridge, and R. F. Oliveira. 2004. Vision and visual variation  
642 in the peacock blenny. *Journal of Fish Biology* **65**:227-250.
- 643 Wilt, F. H. 1959. The differentiation of visual pigments in metamorphosing larvae of *Rana*  
644 *catesbeiana*. *Developmental Biology* **1**:199-233.
- 645 Wright, P. A., and A. J. Turko. 2016. Amphibious fishes: evolution and phenotypic plasticity.  
646 *Journal of Experimental Biology* **219**:2245-2259.
- 647 Xu, B., and Z. Yang. 2013. PAMLX: a graphical user interface for PAML. *Molecular*  
648 *Biology and Evolution* **30**:2723-2724.
- 649 Yang, Z. 2007. PAML 4: phylogenetic analysis by maximum likelihood. *Molecular Biology*  
650 *and Evolution* **24**:1586-1591.
- 651 Yang, Z., W. S. Wong, and R. Nielsen. 2005. Bayes empirical Bayes inference of amino acid  
652 sites under positive selection. *Molecular Biology and Evolution* **22**:1107-1118.
- 653 Yokoyama, S. 2002. Molecular evolution of color vision in vertebrates. *Gene* **300**:69-78.
- 654 Yokoyama, S. 2008. Evolution of dim-light and color vision pigments. *Annu. Rev. Genomics*  
655 *Hum. Genet.* **9**:259-282.
- 656 You, X., C. Bian, Q. Zan, X. Xu, X. Liu, J. Chen, J. Wang, Y. Qiu, W. Li, and X. Zhang.  
657 2014. Mudskipper genomes provide insights into the terrestrial adaptation of  
658 amphibious fishes. *Nature Communications* **5**:5594.
- 659 Zander, C. 1974. Beziehungen zwischen Körperbau und Lebensweise bei Blenniidae (Pisces)  
660 aus dem Roten Meer. III. Morphologie des Auges. *Marine Biology* **28**:61-71.
- 661

662 **Tables**

663

664 **Table 1. Summary of Salariini opsin gene variation**

|                                                             | <i>SWS2A<math>\alpha</math></i> | <i>SWS2A<math>\beta</math></i> | <i>RH2A-1</i> | <i>LWS</i> | <i>RH1</i> |
|-------------------------------------------------------------|---------------------------------|--------------------------------|---------------|------------|------------|
| Total number of nucleotides                                 | 1053                            | 1056                           | 1059          | 1074       | 1065       |
| Total number of amino acids                                 | 350                             | 351                            | 353           | 357        | 354        |
| Variable nucleotide sites                                   | 140                             | 105                            | 64            | 71         | 85         |
| Indels                                                      | 0                               | 0                              | 0             | 0          | 0          |
| <u>Between Salariini species (amino acids)</u>              |                                 |                                |               |            |            |
| Variable transmembrane sites                                | 13(6)                           | 10(2)                          | 3(2)          | 10(3)      | 11(3)      |
| Variable retinal binding pocket sites                       | 1(0)                            | 1(0)                           | 0             | 1(1)       | 2(0)       |
| N <sup>o</sup> of substitutions at known opsin tuning sites | 0                               | 4(0*)                          | 0             | 4(1*)      | 1(1*)      |
| Nonsynonymous substitutions ( <i>dn</i> )                   | 0.014                           | 0.009                          | 0.003         | 0.006      | 0.008      |
| Synonymous substitution ( <i>ds</i> )                       | 0.205                           | 0.147                          | 0.093         | 0.107      | 0.110      |
| <i>dn/ds</i>                                                | 0.068                           | 0.061                          | 0.032         | 0.056      | 0.073      |
| <u>vs. <i>Parablennius parvicornis</i> (amino acids)</u>    |                                 |                                |               |            |            |
| Variable transmembrane sites                                | 22(10)                          | 18(4)                          | 10(2)         | 12(3)      | 14(4)      |
| Variable retinal binding pocket sites                       | 2(1)                            | 1(0)                           | 1(0)          | 1(1)       | 3(1)       |
| Number of substitutions at known tuning sites               | 1(0*)                           | 5(0*)                          | 0             | 5(1*)      | 2(2*)      |

665

666 ( ) substitution with changes in polarity; \* substitutions at known tuning sites of gene in  
 667 question.

668  
669  
670

**Table 2. Summary of transcriptomes, opsin mapping, and proportional opsin gene expression.** # raw reads refers to the total number of paired-end fragments. *RH1* = rod opsin, *SWS2* = short-wavelength sensitive 2, *RH2* = rhodopsin like 2, *LWS* = long-wavelength sensitive

| <u>RNA sequencing</u>                                               |             |                   | Mapping # reads |                                 |                                |                   |               | Proportional opsin and <i>cyp27c1</i> expression % |             |                                     |             |             |                                |             |             |                |             |                |
|---------------------------------------------------------------------|-------------|-------------------|-----------------|---------------------------------|--------------------------------|-------------------|---------------|----------------------------------------------------|-------------|-------------------------------------|-------------|-------------|--------------------------------|-------------|-------------|----------------|-------------|----------------|
| Transcriptome                                                       |             |                   | Rod             | Single cones (SC)               |                                | Double cones (DC) |               | Rod vs Cone                                        |             | Cone opsin vs total cone expression |             |             |                                | SC          |             | DC             |             | <i>Cyp27c1</i> |
| Species                                                             | ID          | # raw reads       | <i>RH1</i>      | <i>SWS2A<math>\alpha</math></i> | <i>SWS2A<math>\beta</math></i> | <i>RH2A-1</i>     | <i>LWS</i>    | R                                                  | C           | <i>SWS2A<math>\alpha</math></i>     | <i>R</i>    | <i>L</i>    | <i>SWS2A<math>\beta</math></i> | <i>R</i>    | <i>L</i>    | <i>Cyp27c1</i> |             |                |
|                                                                     |             |                   |                 |                                 |                                |                   |               |                                                    |             | $\alpha$                            | $\beta$     | $H$         | $W$                            | $S$         | $H$         | $W$            |             |                |
| <i>Alticus simplicirrus</i><br>French Polynesia<br>Terrestrial      | B7          | 20,291,698        | 199,410         | 2,338                           | 2,144                          | 19,738            | 8,713         | 85.7                                               | 14.3        | 7.2                                 | 6.5         | 60.1        | 26.2                           | 52.2        | 47.8        | 69.7           | 30.3        | 0.15           |
|                                                                     | B8          | 15,763,272        | 147,622         | 1,433                           | 1,358                          | 13,712            | 9,508         | 84.9                                               | 15.1        | 5.6                                 | 5.3         | 53.0        | 36.2                           | 51.4        | 48.6        | 59.4           | 40.6        | 0.13           |
|                                                                     | B9          | 22,851,082        | 211,302         | 2,597                           | 1,721                          | 22,119            | 16,189        | 83.1                                               | 16.9        | 6.2                                 | 4.1         | 52.1        | 37.6                           | 60.2        | 39.8        | 58.1           | 41.9        | 0.14           |
|                                                                     | <b>Mean</b> | <b>19,635,351</b> | <b>186,111</b>  | <b>2,123</b>                    | <b>1,741</b>                   | <b>18,523</b>     | <b>11,470</b> | <b>84.6</b>                                        | <b>15.4</b> | <b>6.3</b>                          | <b>5.3</b>  | <b>55.1</b> | <b>33.3</b>                    | <b>54.6</b> | <b>45.4</b> | <b>62.4</b>    | <b>37.6</b> | <b>0.14</b>    |
|                                                                     | <b>Se</b>   | <b>2,072,226</b>  | <b>19,548</b>   | <b>353</b>                      | <b>227</b>                     | <b>2,502</b>      | <b>2371</b>   | <b>0.8</b>                                         | <b>0.5</b>  | <b>0.7</b>                          | <b>2.5</b>  | <b>3.6</b>  | <b>2.8</b>                     | <b>3.7</b>  | <b>0.01</b> |                |             |                |
| <i>Alticus anjouanae</i><br>Seychelles<br>Terrestrial               | B10         | 22,500,526        | 289,057         | 1,785                           | 1,391                          | 13,544            | 6,791         | 92.4                                               | 7.6         | 7.7                                 | 6.0         | 57.8        | 28.6                           | 56.3        | 43.7        | 66.9           | 33.1        | 0.06           |
|                                                                     | B11         | 37,810,316        | 450,726         | 2,341                           | 2,417                          | 20,911            | 14,142        | 91.8                                               | 8.2         | 5.9                                 | 6.1         | 52.8        | 35.2                           | 49.3        | 50.7        | 60.0           | 40.0        | 0.11           |
|                                                                     | B12         | 6,118,452         | 80,619          | 483                             | 613                            | 4,297             | 2,834         | 90.7                                               | 9.3         | 5.9                                 | 7.5         | 52.5        | 34.1                           | 44.1        | 55.9        | 60.6           | 39.4        | 0.18           |
|                                                                     | <b>Mean</b> | <b>22,143,098</b> | <b>273,467</b>  | <b>1,536</b>                    | <b>1,474</b>                   | <b>12,917</b>     | <b>7,922</b>  | <b>91.6</b>                                        | <b>8.4</b>  | <b>6.5</b>                          | <b>6.5</b>  | <b>54.3</b> | <b>32.6</b>                    | <b>49.9</b> | <b>50.1</b> | <b>62.5</b>    | <b>37.5</b> | <b>0.12</b>    |
|                                                                     | <b>Se</b>   | <b>9,150,398</b>  | <b>107,125</b>  | <b>551</b>                      | <b>522</b>                     | <b>4,806</b>      | <b>3,313</b>  | <b>0.5</b>                                         | <b>0.6</b>  | <b>0.5</b>                          | <b>1.7</b>  | <b>2.0</b>  | <b>3.5</b>                     | <b>2.2</b>  | <b>0.03</b> |                |             |                |
| <i>Praealticus caesius</i><br>French Polynesia<br>Mildly Amphibious | B4          | 19,353,526        | 226,133         | 1,262                           | 1,882                          | 7,221             | 2,620         | 94.5                                               | 5.5         | 9.8                                 | 14.6        | 55.7        | 19.9                           | 40.2        | 59.8        | 73.7           | 26.3        | 0.12           |
|                                                                     | B5          | 19,211,400        | 155,934         | 875                             | 1,466                          | 8,382             | 7,093         | 89.7                                               | 10.3        | 5.0                                 | 8.3         | 47.3        | 39.5                           | 37.4        | 62.6        | 54.5           | 45.5        | 0.15           |
|                                                                     | B6          | 27,900,670        | 259,074         | 4,217                           | 8,959                          | 36,687            | 39,094        | 74.3                                               | 25.7        | 4.8                                 | 10.2        | 41.5        | 43.6                           | 32.1        | 67.9        | 48.8           | 51.2        | 0.03           |
|                                                                     | <b>Mean</b> | <b>22,155,199</b> | <b>213,714</b>  | <b>2,118</b>                    | <b>4,102</b>                   | <b>17,430</b>     | <b>16,269</b> | <b>86.1</b>                                        | <b>13.9</b> | <b>6.5</b>                          | <b>11.0</b> | <b>48.2</b> | <b>34.3</b>                    | <b>36.6</b> | <b>63.4</b> | <b>59.0</b>    | <b>41.0</b> | <b>0.10</b>    |
|                                                                     | <b>Se</b>   | <b>2,873,029</b>  | <b>30,415</b>   | <b>1,055</b>                    | <b>2,431</b>                   | <b>9,634</b>      | <b>11,485</b> | <b>6.1</b>                                         | <b>1.6</b>  | <b>1.9</b>                          | <b>4.1</b>  | <b>7.3</b>  | <b>2.4</b>                     | <b>7.5</b>  | <b>0.04</b> |                |             |                |

|                                                                       |             |                   |                |              |               |                |                |             |             |            |             |             |             |             |             |             |             |             |
|-----------------------------------------------------------------------|-------------|-------------------|----------------|--------------|---------------|----------------|----------------|-------------|-------------|------------|-------------|-------------|-------------|-------------|-------------|-------------|-------------|-------------|
| <i>Entomacrodus striatus</i><br>Seychelles<br>Amphibious              | B13         | 27,001,052        | 220,729        | 4,115        | 21,024        | 93,036         | 104,454        | 49.6        | 50.4        | 1.9        | 9.5         | 42.0        | 46.6        | 16.4        | 83.6        | 47.5        | 52.5        | 0.02        |
|                                                                       | B14         | 30,325,336        | 425,996        | 4,523        | 42,449        | 168,400        | 196,605        | 50.6        | 49.4        | 1.1        | 10.4        | 41.1        | 47.4        | 9.7         | 90.3        | 46.5        | 53.5        | 0.01        |
|                                                                       | B15         | 20,757,818        | 223,445        | 2,576        | 28,409        | 111,942        | 112,151        | 46.5        | 53.5        | 1.0        | 11.2        | 44.1        | 43.6        | 8.3         | 91.7        | 50.3        | 49.7        | 0.02        |
|                                                                       | <b>Mean</b> | <b>26,028,069</b> | <b>290,057</b> | <b>3,738</b> | <b>30,627</b> | <b>124,459</b> | <b>137,737</b> | <b>48.9</b> | <b>51.1</b> | <b>1.3</b> | <b>10.4</b> | <b>42.4</b> | <b>45.8</b> | <b>11.5</b> | <b>88.5</b> | <b>48.1</b> | <b>51.9</b> | <b>0.02</b> |
|                                                                       | <b>Se</b>   | <b>2,804,423</b>  | <b>67,974</b>  | <b>593</b>   | <b>6,284</b>  | <b>22,638</b>  | <b>29,518</b>  | <b>1.2</b>  | <b>0.3</b>  | <b>0.5</b> | <b>0.9</b>  | <b>1.1</b>  | <b>2.5</b>  | <b>1.1</b>  | <b>0.00</b> |             |             |             |
| <i>Istiblennius lineatus</i><br>French Polynesia<br>Mildly Amphibious | B1          | 11,510,186        | 127,409        | 401          | 5,351         | 18,821         | 13,210         | 77.0        | 23.0        | 1.1        | 14.3        | 50.0        | 34.6        | 7.0         | 93.0        | 59.1        | 40.9        | 0.19        |
|                                                                       | B2          | 6,765,526         | 56,929         | 273          | 2,728         | 11,077         | 8,243          | 71.6        | 28.4        | 1.2        | 12.3        | 49.9        | 36.6        | 9.1         | 90.9        | 57.7        | 42.3        | 0.19        |
|                                                                       | B3          | 3,343,260         | 28,355         | 154          | 1,310         | 5,102          | 3,810          | 73.0        | 27.0        | 1.5        | 12.7        | 49.4        | 36.4        | 10.5        | 89.5        | 57.6        | 42.4        | 0.52        |
|                                                                       | <b>Mean</b> | <b>7,206,324</b>  | <b>70,898</b>  | <b>276</b>   | <b>3,130</b>  | <b>11,667</b>  | <b>8,421</b>   | <b>73.9</b> | <b>26.1</b> | <b>1.3</b> | <b>13.1</b> | <b>49.8</b> | <b>35.9</b> | <b>8.9</b>  | <b>91.1</b> | <b>58.1</b> | <b>41.9</b> | <b>0.30</b> |
|                                                                       | <b>Se</b>   | <b>2,367,868</b>  | <b>29,435</b>  | <b>71</b>    | <b>1,184</b>  | <b>3,971</b>   | <b>2,715</b>   | <b>1.6</b>  | <b>0.1</b>  | <b>0.6</b> | <b>0.2</b>  | <b>0.6</b>  | <b>1.0</b>  | <b>0.5</b>  | <b>0.11</b> |             |             |             |
| <i>Istiblennius lineatus</i><br>Seychelles<br>Mildly Amphibious       | B16         | 30,354,518        | 367,265        | 1,628        | 33,763        | 125,652        | 101,135        | 58.1        | 41.9        | 0.6        | 13.0        | 48.2        | 38.2        | 4.6         | 95.4        | 55.8        | 44.2        | 0.03        |
|                                                                       | B17         | 56,930,548        | 607,878        | 2,689        | 60,877        | 213,029        | 178,091        | 57.0        | 43.0        | 0.6        | 13.5        | 47.1        | 38.8        | 4.2         | 95.8        | 54.8        | 45.2        | 0.04        |
|                                                                       | B18         | 7,165,396         | 89,373         | 438          | 9,546         | 33,658         | 27,844         | 55.3        | 44.7        | 0.6        | 13.5        | 47.3        | 38.6        | 4.4         | 95.6        | 55.1        | 44.9        | 0.02        |
|                                                                       | <b>Mean</b> | <b>31,483,487</b> | <b>354,839</b> | <b>1,585</b> | <b>34,729</b> | <b>124,113</b> | <b>102,357</b> | <b>56.8</b> | <b>43.2</b> | <b>0.6</b> | <b>13.3</b> | <b>47.5</b> | <b>38.5</b> | <b>4.4</b>  | <b>95.6</b> | <b>55.2</b> | <b>44.8</b> | <b>0.03</b> |
|                                                                       | <b>Se</b>   | <b>14,377,048</b> | <b>149,808</b> | <b>650</b>   | <b>14,826</b> | <b>51,786</b>  | <b>43,377</b>  | <b>0.8</b>  | <b>0.0</b>  | <b>0.2</b> | <b>0.3</b>  | <b>0.2</b>  | <b>0.1</b>  | <b>0.3</b>  | <b>0.01</b> |             |             |             |
| <i>Salarias fasciatus</i><br>Australia<br>Aquatic                     |             | 44,650,228        | 795,112        | 4,592        | 25,534        | 83,252         | 84,588         | 79.9        | 20.1        | 2.3        | 13.0        | 42.3        | 42.4        | 15.3        | 84.7        | 50.0        | 50.0        | 0.09        |

672 **Figures**

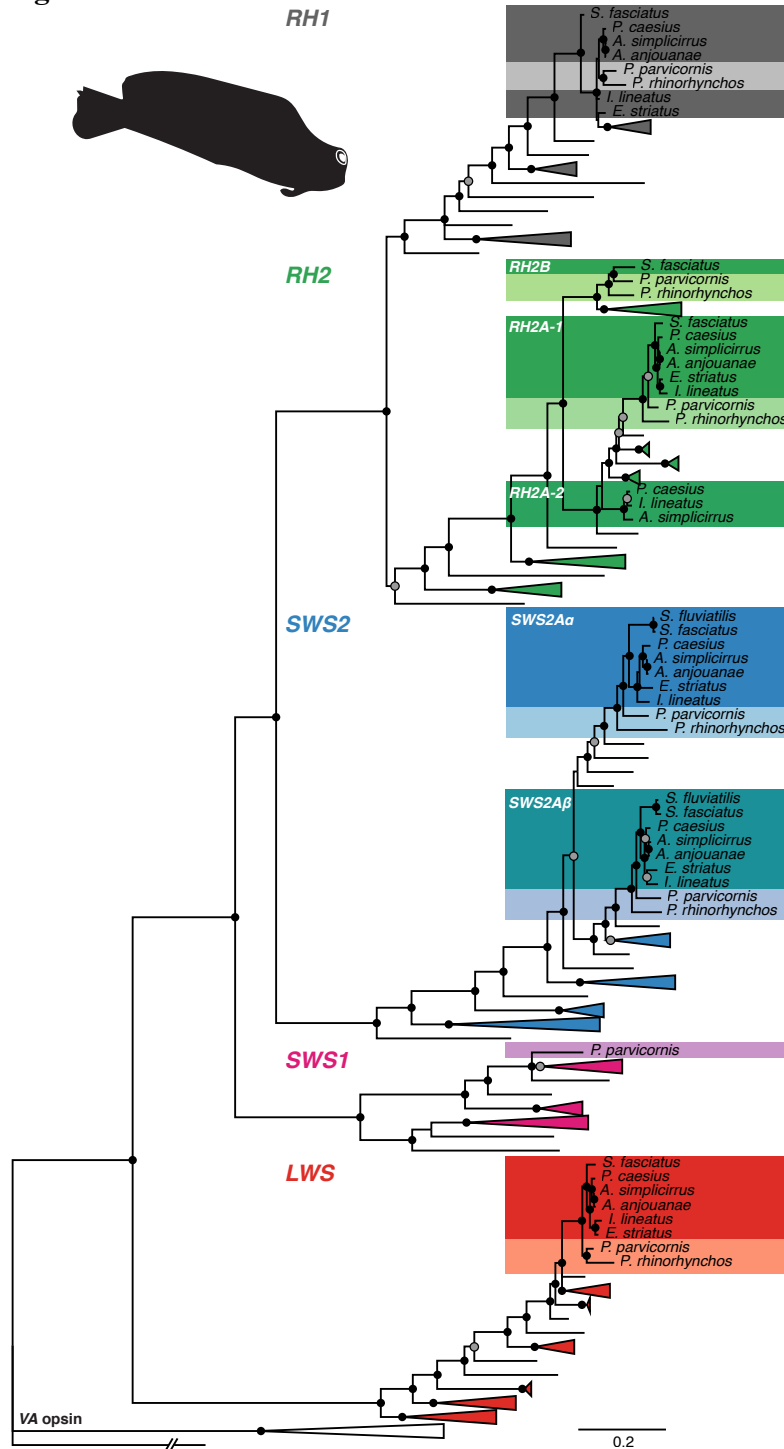

673  
674

675 **Fig. 1. Bayesian consensus phylogeny for vertebrate opsin genes.** The Salariini retinal  
676 transcriptomes contained seven opsin genes. One rod opsin (*RH1*) and six cone opsin genes  
677 belonging to three different cone opsin classes: short-wavelength-sensitive 2 (*SWS2A $\alpha$* ,  
678 *SWS2A $\beta$* ), rhodopsin-like 2 (*RH2A-1*, *RH2A-2*, *RH2B*), and long-wavelength-sensitive (*LWS*).  
679 Note that *RH2A-2* was found at very low expression levels in three out of the six Salariini  
680 species, while *RH2B* was lowly expressed in *Salarias fasciatus* alone (also see Fig. 2, Table  
681 2). Dark shading indicates genes from various Salariini species, light shading genes from  
682 sister species (Blenniidae). Black and grey spheres indicate Bayesian posterior probabilities >  
683 0.9 and 0.7, respectively.

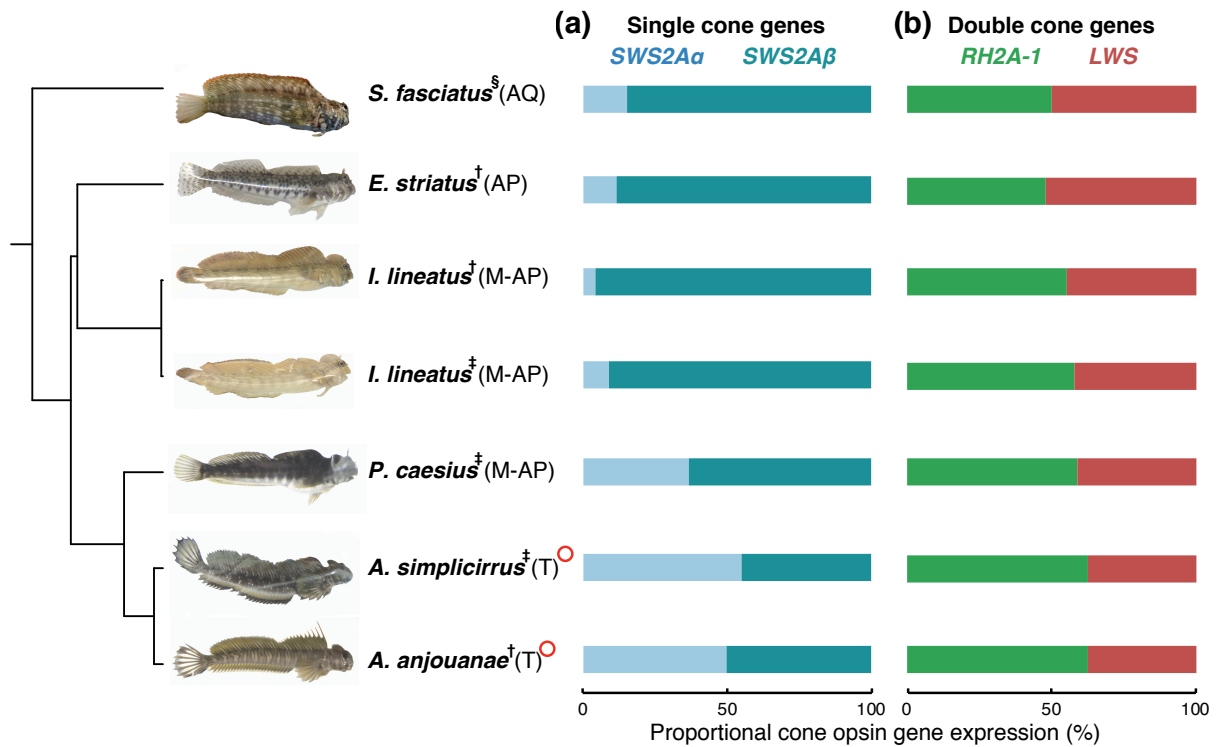

684  
685

686 **Fig. 2. Salariini species phylogeny and associated opsin gene expression.** a) Salariini  
687 species (n = 3 per species, except for *S. fasciatus* where n = 1) expressed two paralogs of the  
688 short-wavelength-sensitive 2A opsin gene (*SWS2Aα*, *SWS2Aβ*), and b) one rhodopsin-like 2  
689 (*RH2A-1*) and a long-wavelength-sensitive (*LWS*) opsin gene. The mean proportional gene  
690 expression was similar between species independent of habitat or sampling location, except  
691 for the *SWS2A* paralogs in the clade containing *Pr. caesius* and the two *Alticus* spp.  
692 Displayed are the mean expression values separated by cone specificity (Hunt et al., 2014).  
693 For details on individual expression values and gene expression in relation to total cone and  
694 total opsin expression see Table 2. A red circle indicates terrestrial *Alticus* spp., which use  
695 red dorsal fins for aggressive and courtship displays (Bhikajee and Green 2002, Shimizu et  
696 al. 2006, Ord and Tonia Hsieh 2011). AQ = aquatic, AP = amphibious, M-AP = mildly-  
697 amphibious, T = Terrestrial, definitions and phylogeny as per (Ord & Cooke, 2016). †  
698 Seychelles, ‡ French Polynesia, § Heron Island (Australia).

699  
700
